# Supplementary material
Source: Springer Nature journal article supplement (https://www.springermedizin.de/resource/supplementary/13075_2011_3279_MOESM5_ESM.pdf/9694152)

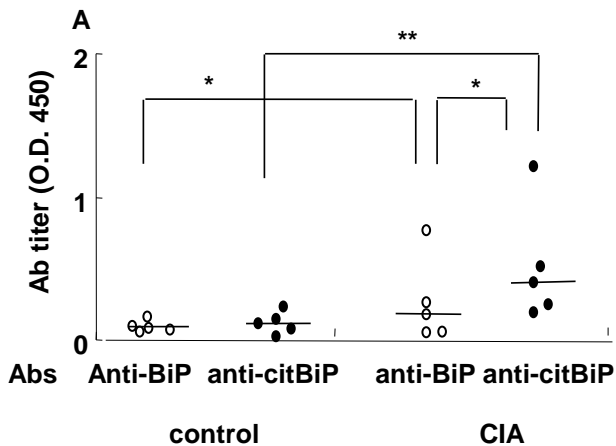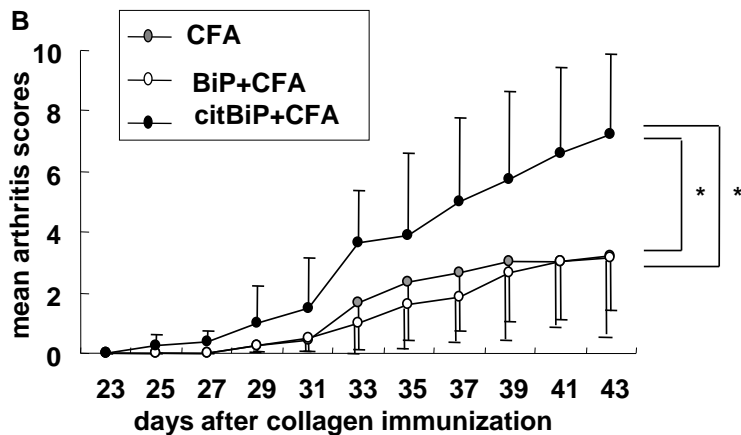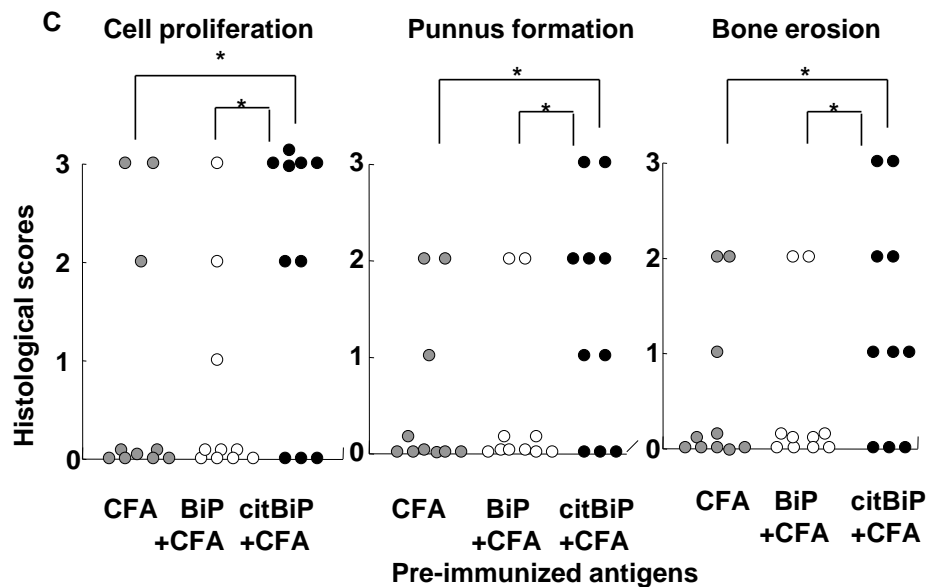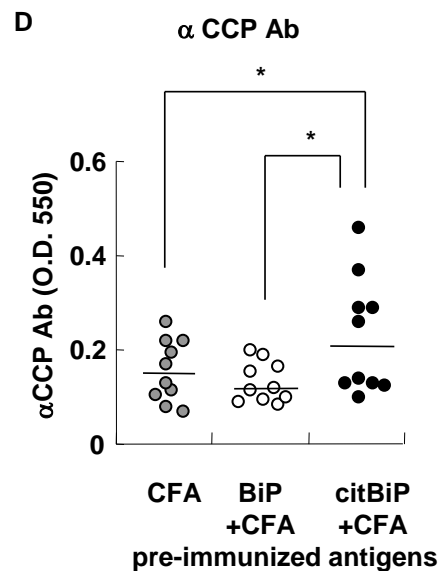

Supplement: MOESM5 [file 9694152]
